# Supplementary material for: New Biomarker in Chagas Disease: Extracellular Vesicles Isolated from Peripheral Blood in Chronic Chagas Disease Patients Modulate the Human Immune Response
Source: Hindawi journal article supplement (doi:10.1155/2021/6650670), 2021-01-11
Supplement: f1 [file 6650670.f1.zip]

| <b>Number ID<br/>(*controls)</b> | <b>Sex</b> | <b>Age</b> | <b>Infection in<br/>the last 15<br/>days</b> | <b>Antiinflammatories in<br/>the last 15 days</b> | <b>Clinical form/ Cardiac<br/>Burden</b>                    |
|----------------------------------|------------|------------|----------------------------------------------|---------------------------------------------------|-------------------------------------------------------------|
| <b>1</b>                         | F          | 56         | N                                            | N                                                 | indeterminate                                               |
| <b>2</b>                         | M          | 55         | N                                            | N                                                 | electrocardiogram alteration<br>and ventricular dysfunction |
| <b>3</b>                         | M          | 70         | N                                            | N                                                 | electrocardiogram alteration                                |
| <b>4</b>                         | M          | 55         | N                                            | N                                                 | indeterminate                                               |
| <b>5</b>                         | F          | 73         | N                                            | N                                                 | indeterminate                                               |
| <b>6</b>                         | M          | 42         | N                                            | N                                                 | electrocardiogram alteration<br>and ventricular dysfunction |
| <b>7</b>                         | M          | 62         | N                                            | N                                                 | indeterminate                                               |
| <b>8</b>                         | F          | 57         | N                                            | N                                                 | electrocardiogram alteration<br>and ventricular dysfunction |
| <b>9</b>                         | F          | 59         | N                                            | N                                                 | electrocardiogram alteration<br>and ventricular dysfunction |
| <b>10</b>                        | F          | 72         | N                                            | N                                                 | electrocardiogram alteration                                |
| <b>11</b>                        | F          | 71         | N                                            | N                                                 | electrocardiogram alteration<br>and ventricular dysfunction |
| <b>12</b>                        | F          | 55         | Y (cold)                                     | N                                                 | electrocardiogram alteration                                |
| <b>13</b>                        | F          | 61         | N                                            | N                                                 | electrocardiogram alteration                                |
| <b>14</b>                        | M          | 53         | N                                            | N                                                 | electrocardiogram alteration<br>and ventricular dysfunction |
| <b>15</b>                        | M          | 71         | N                                            | N                                                 | electrocardiogram alteration<br>and ventricular dysfunction |
| <b>16</b>                        | F          | 79         | N                                            | N                                                 | indeterminate                                               |
| <b>17</b>                        | F          | 57         | N                                            | N                                                 | electrocardiogram alteration<br>and ventricular dysfunction |
| <b>18</b>                        | M          | 60         | N                                            | N                                                 | electrocardiogram alteration                                |
| <b>19</b>                        | M          | 46         | N                                            | N                                                 | electrocardiogram alteration<br>and ventricular dysfunction |

|           |   |    |   |   |                                                          |
|-----------|---|----|---|---|----------------------------------------------------------|
| <b>20</b> | M | 57 | N | N | electrocardiogram alteration and ventricular dysfunction |
| <b>21</b> | F | 62 | N | N | electrocardiogram alteration                             |
| <b>22</b> | F | 58 | N | N | electrocardiogram alteration                             |
| <b>23</b> | M | 43 | N | N | electrocardiogram alteration and ventricular dysfunction |
| <b>24</b> | F | 67 | N | N | electrocardiogram alteration                             |
| <b>25</b> | M | 70 | N | N | electrocardiogram alteration                             |
| <b>27</b> | F | 58 | N | N | electrocardiogram alteration                             |
| <b>28</b> | F | 72 | N | N | indeterminate                                            |
| <b>29</b> | F | 75 | N | N | electrocardiogram alteration                             |
| <b>30</b> | M | 67 | N | N | electrocardiogram alteration                             |
| <b>31</b> | F | 63 | N | N | electrocardiogram alteration                             |
| <b>32</b> | M | 69 | N | N | indeterminate                                            |
| <b>33</b> | F | 45 | N | N | electrocardiogram alteration                             |
| <b>34</b> | M | 63 | N | N | electrocardiogram alteration and ventricular dysfunction |
| <b>35</b> | M | 81 | N | N | indeterminate                                            |
| <b>36</b> | F | 46 | N | N | electrocardiogram alteration and ventricular dysfunction |
| <b>37</b> | F | 51 | N | N | electrocardiogram alteration and ventricular dysfunction |
| <b>38</b> | F | 30 | N | N | electrocardiogram alteration and ventricular dysfunction |
| <b>39</b> | F | 49 | N | N | indeterminate                                            |
| <b>40</b> | F | 76 | N | N | indeterminate                                            |
| <b>41</b> | M | 65 | N | N | electrocardiogram alteration                             |
| <b>1*</b> | F | 30 | N | N | ----                                                     |
| <b>2*</b> | F | 26 | N | N | ----                                                     |
| <b>3*</b> | M | 30 | N | N | ----                                                     |
| <b>4*</b> | F | 50 | N | N | ----                                                     |
| <b>5*</b> | F | 20 | N | N | ----                                                     |
| <b>6*</b> | M | 22 | N | N | ----                                                     |
| <b>7*</b> | F | 39 | N | N | ----                                                     |

|     |   |    |          |   |      |
|-----|---|----|----------|---|------|
| 8*  | F | 26 | N        | N | ---- |
| 9*  | F | 25 | N        | N | ---- |
| 10* | F | 36 | N        | N | ---- |
| 11* | F | 32 | N        | N | ---- |
| 12* | M | 32 | N        | N | ---- |
| 13* | M | 26 | Y (cold) | N | ---- |
| 14* | M | 25 | N        | N | ---- |
| 15* | F | 25 | N        | N | ---- |
| 16* | F | 41 | N        | N | ---- |
| 17* | F | 26 | N        | N | ---- |
| 18* | M | 37 | N        | N | ---- |
| 19* | F | 29 | N        | N | ---- |
| 20* | M | 24 | N        | N | ---- |
| 21* | F | 24 | N        | N | ---- |
| 22* | F | 23 | N        | N | ---- |
| 23* | M | 19 | N        | N | ---- |
| 24* | M | 24 | N        | N | ---- |
| 25* | F | 28 | N        | N | ---- |
| 26* | F | 21 | N        | N | ---- |
| 27* | M | 21 | N        | N | ---- |
| 28* | F | 21 | N        | N | ---- |
| 29* | F | 24 | N        | N | ---- |
| 30* | F | 26 | N        | N | ---- |

| NYHA Functional Class | Ejection Fraction | Heart Rhythm                                                                                                                                | EVs Mean Concentration (particles/mL) | EVs Mean Size (nm) |
|-----------------------|-------------------|---------------------------------------------------------------------------------------------------------------------------------------------|---------------------------------------|--------------------|
| II                    | 0.65              | NL                                                                                                                                          | 1,51E+09                              | 188,6              |
| IV                    | 0.31              | left atrial overload, complete right bundle branch block, left anterior fascicular block, premature ventricular contraction                 | 6,80E+08                              | 179,5              |
| I                     | 0.71              | atrial fibrillation                                                                                                                         | 1,25E+09                              | 156,5              |
| I                     | 0.66              | NL                                                                                                                                          | 8,39E+08                              | 156,2              |
| I                     | 0.68              | NL                                                                                                                                          | 3,22E+08                              | 208,1              |
| II                    | 0.4               | sinus bradycardia, left anterior fascicular block, complete right bundle branch block, non-specific ventricular repolarization alteration   | 3,84E+08                              | 266,2              |
| I                     | 0.6               | final conduction delay                                                                                                                      | 2,08E+08                              | 121,6              |
| II                    | 0.2               | non-specific intraventricular conduction delay, non-specific ventricular repolarization alteration, left anterior fascicular block          | 4,54E+08                              | 163,6              |
| IV                    | 0.3               | pacemaker                                                                                                                                   | 3,63E+08                              | 236,1              |
| I                     | 0.5               | left anterior fascicular block, complete right bundle branch block                                                                          | 3,28E+08                              | 225,6              |
| IV                    | 0.2               | sinus bradycardia, left anterior fascicular block, complete right bundle branch block                                                       | 1,45E+08                              | 212,6              |
| I                     | 0.41              | left anterior fascicular block, complete right bundle branch block, non-specific ventricular repolarization alteration                      | 8,10E+08                              | 196,8              |
| II                    | 0.7               | left anterior fascicular block, complete right bundle branch block, anteroseptal electrical inactivity, first degree atrioventricular block | 2,65E+08                              | 264,2              |
| I                     | 0.3               | pacemaker                                                                                                                                   | 2,01E+08                              | 110,5              |
| II                    | 0.3               | complete right bundle branch block, left anterior fascicular block, premature ventricular contraction                                       | 7,90E+08                              | 177,5              |
| I                     | 0.6               | NL                                                                                                                                          | 1,61E+09                              | 241,8              |
| I                     | 0,39              | left anterior fascicular block, complete right bundle branch block, non-specific ventricular repolarization alteration                      | 1,24E+09                              | 214,2              |
| I                     | 0,58              | non-specific ventricular repolarization alteration                                                                                          | 3,09E+08                              | 169,2              |
| I                     | 0,25              | left ventricular overload, complete right bundle branch block, left anterior fascicular block                                               | 5,76E+08                              | 212,4              |

|      |      |                                                                                                                                                                     |          |       |
|------|------|---------------------------------------------------------------------------------------------------------------------------------------------------------------------|----------|-------|
| IV   | 0,22 | final conduction delay, left atrial overload, premature ventricular contraction, inferior electrical inactivity, non-specific ventricular repolarization alteration | 1,11E+09 | 186,5 |
| I    | 0,57 | left anterior fascicular block, final conduction delay, left ventricular overload                                                                                   | 3,55E+08 | 230,6 |
| I    | 0,60 | non-specific ventricular repolarization alteration                                                                                                                  | 1,44E+08 | 261,3 |
| I    | 0,20 | final conduction delay, non-specific ventricular repolarization alteration                                                                                          | 1,35E+08 | 303,3 |
| I    | 0,57 | first degree atrioventricular block, septal force diminishment, non-specific ventricular repolarization alteration                                                  | 1,70E+08 | 189,1 |
| I    | 0,62 | complete right bundle branch block, inferior electrical inactivity                                                                                                  | 2,21E+08 | 275,7 |
| I    | 0,61 | premature ventricular contraction, BIG                                                                                                                              | 6,14E+08 | 257,2 |
| I    | 0,65 | NL                                                                                                                                                                  | 1,72E+06 | 72,7  |
| II   | 0,66 | isolated premature ventricular contraction                                                                                                                          | 1,90E+08 | 263,1 |
| I    | 0,66 | atrial fibrillation, left anterior fascicular block                                                                                                                 | 1,82E+08 | 199,7 |
| I    | 0,66 | left anterior fascicular block, non-specific ventricular repolarization alteration                                                                                  | 6,23E+08 | 137,8 |
| I    | 0,81 | NL                                                                                                                                                                  | 1,87E+08 | 216,6 |
| I    | 0,69 | sinus ectopic rhythm                                                                                                                                                | 3,41E+07 | 167,6 |
| I    | 0,45 | non-specific ventricular repolarization alteration                                                                                                                  | 1,37E+08 | 279   |
| I    | 0,68 | NL                                                                                                                                                                  | 4,07E+08 | 277,9 |
| II   | 0,35 | premature ventricular contraction, non-specific ventricular repolarization alteration                                                                               | 5,45E+08 | 336,4 |
| I    | 0,33 | pacemaker                                                                                                                                                           | 5,11E+07 | 190,6 |
| I    | 0,40 | premature ventricular contraction, left anterior fascicular block, final conduction delay                                                                           | 2,93E+08 | 176,6 |
| I    | 0,64 | NL                                                                                                                                                                  | 4,03E+08 | 163,9 |
| II   | 0,62 | NL                                                                                                                                                                  | 6,25E+08 | 202,4 |
| I    | 0,62 | left anterior fascicular block, complete right bundle branch block                                                                                                  | 2,58E+08 | 166,6 |
| ---- | ---- | ----                                                                                                                                                                | 1,27E+09 | 144,2 |
| ---- | ---- | ----                                                                                                                                                                | 7,71E+08 | 161   |
| ---- | ---- | ----                                                                                                                                                                | 6,02E+08 | 164   |
| ---- | ---- | ----                                                                                                                                                                | 1,04E+09 | 173,2 |
| ---- | ---- | ----                                                                                                                                                                | 9,56E+08 | 184,1 |
| ---- | ---- | ----                                                                                                                                                                | 4,27E+08 | 100,9 |
| ---- | ---- | ----                                                                                                                                                                | 1,10E+09 | 195,8 |

|      |      |      |          |       |
|------|------|------|----------|-------|
| ---- | ---- | ---- | 6,95E+08 | 191,6 |
| ---- | ---- | ---- | 6,18E+08 | 199,6 |
| ---- | ---- | ---- | 2,18E+07 | 361,1 |
| ---- | ---- | ---- | 1,49E+08 | 226,8 |
| ---- | ---- | ---- | 2,42E+08 | 237,6 |
| ---- | ---- | ---- | 6,03E+07 | 282,6 |
| ---- | ---- | ---- | 3,87E+07 | 270,5 |
| ---- | ---- | ---- | 3,05E+07 | 284,7 |
| ---- | ---- | ---- | 8,58E+07 | 179   |
| ---- | ---- | ---- | 1,47E+08 | 147,4 |
| ---- | ---- | ---- | 1,70E+08 | 132   |
| ---- | ---- | ---- | 5,02E+08 | 170,1 |
| ---- | ---- | ---- | 8,18E+08 | 267,4 |
| ---- | ---- | ---- | 6,95E+08 | 249,4 |
| ---- | ---- | ---- | 4,36E+08 | 228,8 |
| ---- | ---- | ---- | 1,09E+09 | 280,2 |
| ---- | ---- | ---- | 1,12E+09 | 275,6 |
| ---- | ---- | ---- | 4,76E+08 | 183,9 |
| ---- | ---- | ---- | 5,67E+08 | 192,9 |
| ---- | ---- | ---- | 1,54E+08 | 176,4 |
| ---- | ---- | ---- | 4,03E+08 | 129,5 |
| ---- | ---- | ---- | 6,28E+08 | 157,7 |
| ---- | ---- | ---- | 3,23E+08 | 167,4 |

| EVs D10<br>(nm) | EVs D50<br>(nm) | EVs D90<br>(nm) | THP-1 IFN-<br>γ (pg/mL) | THP-1 IL-<br>17<br>(pg/mL) |
|-----------------|-----------------|-----------------|-------------------------|----------------------------|
| 109,2           | 173,2           | 280,3           | 6,247694                | 7,552713                   |
| 62              | 173,7           | 312,6           | 6,580625                | 7,552713                   |
| 46,4            | 119,1           | 332,3           | 6,25507                 | 7,470708                   |
| 85,7            | 135,8           | 249             | 6,112791                | 7,373477                   |
| 128,3           | 190,5           | 292,6           | 6,366765                | 7,487038                   |
| 127,5           | 251,6           | 400,5           | 6,116399                | 6,860889                   |
| 45,4            | 113,6           | 216,6           | 6,25507                 | 7,022552                   |
| 65              | 159,1           | 293,2           | 5,77961                 | 7,135899                   |
| 78,1            | 222,9           | 399,6           | 6,25507                 | 7,53624                    |
| 76,7            | 226,8           | 420,1           | 6,269849                | 7,487038                   |
| 148,3           | 199,8           | 281             | 6,170766                | 7,400358                   |
| 66              | 176,1           | 352,2           | 6,247694                | 7,448991                   |
| 123,3           | 240,1           | 432,1           | 5,963185                | 7,352043                   |
| 31,6            | 87,5            | 209,3           | 6,295795                | 7,427337                   |
| 113,6           | 157,7           | 278,1           | 6,15259                 | 7,378845                   |
| 141,8           | 215,9           | 394,1           | 6,252964                | 6,376693                   |
| 143             | 192,1           | 305             | 6,244285                | 6,362175                   |
| 121,3           | 146,5           | 224,4           | 6,455936                | 6,391243                   |
| 113,9           | 191,1           | 351,9           | 6,23129                 | 6,383964                   |

|       |       |       |          |          |
|-------|-------|-------|----------|----------|
| 122,2 | 179,4 | 277   | 5,829415 | 6,362175 |
| 129,3 | 207   | 423   | 6,252964 | 6,208187 |
| 164,4 | 258   | 363,6 | 6,218321 | 6,265045 |
| 161,8 | 272,4 | 461,4 | 6,389036 | 6,329632 |
| 101,4 | 176,2 | 316,8 | 6,40236  | 6,380327 |
| 164,2 | 223,6 | 426,7 | 6,982955 | 6,416786 |
| 137,4 | 230,4 | 423,2 | 6,810546 | 6,409478 |
| 67,1  | 72,2  | 77,8  | 5,993613 | 6,413131 |
| 166,1 | 232,7 | 376,5 | 5,685486 | 6,394886 |
| 148   | 208,6 | 238,9 | 6,491902 | 6,424103 |
| 78,4  | 113,1 | 240,8 | 5,809209 | 6,387602 |
| 133,6 | 204,7 | 338,7 | 6,455936 | 6,383964 |
| 56,7  | 137,2 | 310   | 6,455936 | 6,37306  |
| 133   | 282,2 | 427,4 | 6,546227 | 6,318822 |
| 154,7 | 264   | 427,4 | 6,791654 | 6,365802 |
| 169,9 | 334,8 | 523   | 6,4425   | 6,380327 |
| 123   | 170,4 | 306,3 | 6,261654 | 6,409478 |
| 115,5 | 148,7 | 279,3 | 6,537142 | 6,416786 |
| 106,6 | 135,6 | 265,3 | 6,188167 | 6,402178 |
| 129,3 | 180,1 | 330,3 | 6,287799 | 6,402178 |
| 101   | 137,7 | 275,9 | 6,054232 | 6,835234 |
| 97,2  | 129,4 | 205,6 | 5,949129 | 7,384218 |
| 114,6 | 133,6 | 242,8 | 6,13085  | 7,362752 |
| 112,3 | 148,7 | 239,2 | 6,087599 | 7,389594 |
| 118,3 | 153,4 | 243,5 | 6,037525 | 7,378845 |
| 95,5  | 161,5 | 292,1 | 6,214608 | 7,394974 |
| 23,2  | 85,5  | 181,5 | 6,167127 | 7,389594 |
| 129,7 | 169,8 | 302,8 | 5,994932 | 7,336008 |



|       |       |       |          |          |
|-------|-------|-------|----------|----------|
| 119,5 | 168,7 | 285,5 | 5,942114 | 7,368113 |
| 128,4 | 180,4 | 278,9 | 5,64664  | 6,714969 |
| 333,4 | 362   | 383,1 | 5,807156 | 6,618542 |
| 155,7 | 202,6 | 343,5 | 6,068008 | 6,794908 |
| 85,1  | 223,6 | 400,5 | 6,2122   | 6,78598  |
| 197,2 | 237,5 | 440,4 | 6,231054 | 6,732652 |
| 139,5 | 252,2 | 410   | 6,193404 | 6,653445 |
| 131,7 | 230   | 541,6 | 6,054232 | 6,675353 |
| 66    | 163,8 | 334,8 | 6,169988 | 6,803849 |
| 66,2  | 135   | 215,8 | 6,235776 | 6,87128  |
| 57,8  | 120,7 | 231   | 6,179344 | 6,794908 |
| 113,7 | 152,8 | 234,8 | 6,132708 | 6,799377 |
| 156,6 | 219,5 | 461,2 | 6,174664 | 6,821766 |
| 158,3 | 208,7 | 406,6 | 5,99036  | 6,768157 |
| 136,3 | 200   | 358,4 | 6,264185 | 6,781519 |
| 156,9 | 231,8 | 454,5 | 6,031343 | 6,772608 |
| 160,2 | 231,1 | 469,4 | 6,00854  | 6,925706 |
| 106,2 | 174,7 | 279,6 | 6,142007 | 6,799377 |
| 120,3 | 163,7 | 317,2 | 5,846885 | 6,723805 |
| 103,1 | 163,1 | 269,6 | 6,114152 | 6,893905 |
| 80,8  | 114,5 | 211   | 5,967712 | 6,889374 |
| 97,1  | 135,5 | 240,9 | 6,013094 | 6,907516 |
| 110,8 | 154,1 | 233   | 6,297492 | 6,934819 |
